# Supplementary material
Source: Research Square preprint supplement (doi:10.21203/rs.3.rs-9271842/v1)
Supplement: Supplementary file 1 [file bbc97abb9f06a96fcdedb301.pdf]

# The Role of Electronic Engine Control on Real-World NO<sub>x</sub> Emissions from Ocean-Going Vessels

## AUTHOR NAMES:

Johan Mellqvist<sup>1\*</sup>, Edward W. Carr<sup>2\*†</sup>, I-Ling Elaine Shen<sup>3\*</sup>, Samantha McCabe<sup>2</sup>, Xian-Liang “Tony” Tian<sup>3</sup>, Vladimir Conde<sup>1</sup>, Jukka-Pekka Jalkanen<sup>4</sup>, Mikko Heikkilä<sup>4</sup>

## AUTHOR ADDRESSES

<sup>1</sup> Chalmers University of Technology, 41296 Göteborg, Sweden

<sup>2</sup> Energy and Environmental Research Associates (EERA), Wilmington, NC, USA

<sup>3</sup> South Coast Air Quality Management District, Diamond Bar, CA, USA

<sup>4</sup> Finnish Meteorological Institute, Helsinki, Finland

\* Equal first authors

† Corresponding Author: Edward W. Carr, EERA. [ecarr@eera.io](mailto:ecarr@eera.io).

## Supplemental

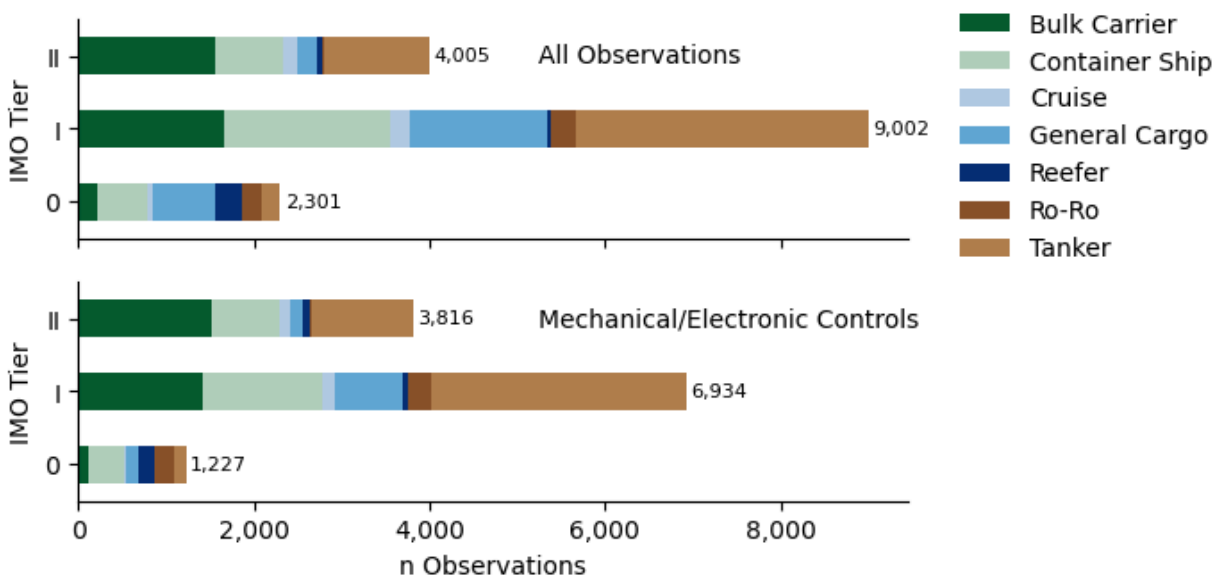

**Figure S1** Distribution of ship types in the full dataset (top panel) and in the subset with known engine controls, i.e., mechanical or electronic (lower panel).

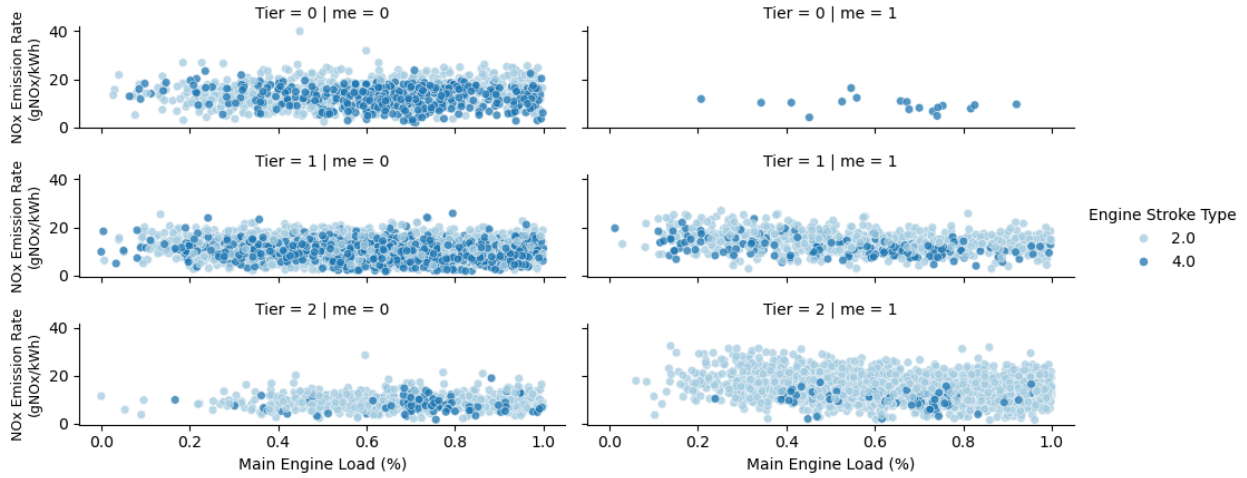

**Figure S2** Derived brake-specific NOx emissions (g/kWh) versus main engine load for the full dataset, divided into separate engine Tiers and engine controls (Mechanical: me = 0, Electronic: me = 1).

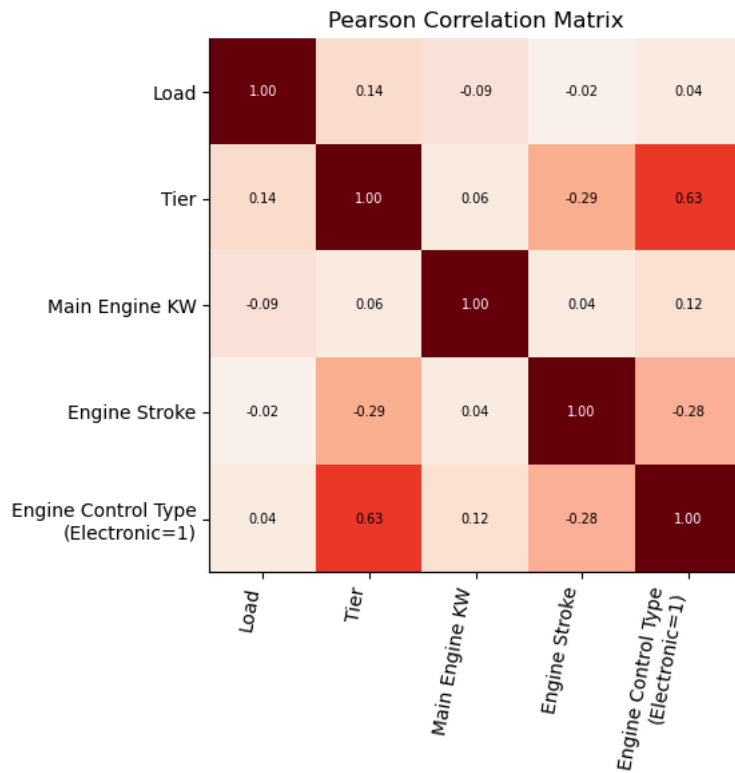

**Figure S3.** Pearson correlation coefficient matrix for explanatory variables.

Table S1. Mann-Whitney tests comparing observed emission rates from mechanical and electronically controlled engines.

| Engine Model | Tier | n Mechanical | n Electronic | gNOx/kWh               |                        |           | $r_{rb}$ | p     | sig |
|--------------|------|--------------|--------------|------------------------|------------------------|-----------|----------|-------|-----|
|              |      |              |              | Median MC (Mechanical) | Median ME (Electronic) | Delta (%) |          |       |     |
| 12K98        | I    | 24           | 1            | 20.61                  | 28.75                  | 39.5      | -        | -     | -   |
| 5S50         | II   | 33           | 209          | 8.43                   | 12.70                  | 50.7      | 0.789    | 0.000 | *** |
| 5S60         | I    | 94           | 1            | 10.48                  | 11.03                  | 5.3       | -        | -     | -   |
| 5S60         | II   | 42           | 147          | 9.01                   | 14.05                  | 55.9      | 0.742    | 0.000 | *** |
| 6L70         | I    | 123          | 208          | 13.55                  | 15.34                  | 13.2      | 0.337    | 0.000 | *** |
| 6S35         | II   | 3            | 7            | 7.99                   | 4.74                   | -40.7     | -        | -     | -   |
| 6S46         | I    | 261          | 1            | 12.80                  | 15.93                  | 24.4      | -        | -     | -   |
| 6S46         | II   | 155          | 51           | 10.34                  | 13.80                  | 33.4      | 0.431    | 0.000 | *** |
| 6S50         | I    | 1068         | 5            | 13.08                  | 18.50                  | 41.5      | 0.614    | 0.014 | *   |
| 6S50         | II   | 114          | 625          | 9.79                   | 15.29                  | 56.2      | 0.688    | 0.000 | *** |
| 6S60         | I    | 791          | 13           | 10.40                  | 12.32                  | 18.5      | 0.374    | 0.021 | *   |
| 6S60         | II   | 126          | 312          | 9.02                   | 16.96                  | 88.1      | 0.808    | 0.000 | *** |
| 6S70         | I    | 134          | 55           | 12.98                  | 15.26                  | 17.6      | 0.272    | 0.003 | **  |
| 6S70         | II   | 17           | 299          | 8.63                   | 26.85                  | 211.0     | 0.821    | 0.000 | *** |
| 7K80         | I    | 9            | 15           | 11.19                  | 20.25                  | 81.1      | 0.748    | 0.003 | **  |
| 7L70         | I    | 39           | 3            | 14.73                  | 14.61                  | -0.8      | -        | -     | -   |
| 7S50         | I    | 240          | 3            | 13.69                  | 14.37                  | 5.0       | -        | -     | -   |
| 7S50         | II   | 55           | 11           | 8.75                   | 17.74                  | 102.8     | 0.864    | 0.000 | *** |
| 7S60         | I    | 406          | 62           | 10.80                  | 12.45                  | 15.4      | 0.344    | 0.000 | *** |
| 7S60         | II   | 11           | 40           | 8.42                   | 17.98                  | 113.6     | 0.909    | 0.000 | *** |
| 7S70         | I    | 22           | 10           | 14.86                  | 12.59                  | -15.3     | -0.364   | 0.108 | ns  |
| 8K90         | I    | 10           | 3            | 14.36                  | 18.35                  | 27.8      | -        | -     | -   |
| 8S35         | I    | 11           | 27           | 11.31                  | 14.76                  | 30.5      | 0.556    | 0.008 | **  |
| 8S50         | I    | 61           | 17           | 14.34                  | 17.21                  | 20.1      | 0.439    | 0.006 | **  |

Table S2. Explanations of regression variables used

| Variable                   | Interpretation relative to reference category                                                                                                                                                                                                                                                                                                                                                                                                                                           | Notes                                                                                                                                                                                                                                   |
|----------------------------|-----------------------------------------------------------------------------------------------------------------------------------------------------------------------------------------------------------------------------------------------------------------------------------------------------------------------------------------------------------------------------------------------------------------------------------------------------------------------------------------|-----------------------------------------------------------------------------------------------------------------------------------------------------------------------------------------------------------------------------------------|
| Load and Load <sup>2</sup> | Effect of relative main engine load ( ranging between 0 and 100 %) on NOx emission rates (g/kWh). Statistically significant coefficients for both the linear and quadratic terms would indicate a nonlinear relationship between NOx emissions and main engine load. The nonlinear relationship is expected to exhibit a nonsymmetrical U-shaped curve based on literature and engine certification results.                                                                            | Coefficients cannot be interpreted separately without considering both terms.                                                                                                                                                           |
| Tier                       | IMO NOx engine tier: Tier 0, I, and II, with Tier I being the reference category in the model. Based on the intent of the IMO regulation, a positive coefficient is expected for Tier 0 engines, which would indicate higher NO emission rates for Tier 0 than Tier I engines, whereas a negative coefficient is expected for Tier II engines, which would indicate lower NO emission rates for Tier II than Tier I engines.                                                            | The measurements data do not include a sufficient number of Tier III samples; therefore, Tier III are excluded from the analysis.                                                                                                       |
| Stroke                     | Number of strokes of a main engine: either 2 or 4 strokes, with 2-stroke engine being the reference category in the model. Because 2-stroke ship engines tend to be slow-speed engines (i.e., fewer revolutions per minute, or RPM) and IMO NOx limits are higher for lower-speed engines, 2-stroke engines can be expected to emit NOx at a higher rate than 4-stroke engines; in other words, a negative coefficient is expected for 4-stroke with 2-stroke engines as the reference. |                                                                                                                                                                                                                                         |
| log Main Engine kW         | Change in NOx emission rate per log-unit increase in installed main engine power.                                                                                                                                                                                                                                                                                                                                                                                                       | Larger engines may have different design/operation patterns.                                                                                                                                                                            |
| Engine Control Type        | A binary variable representing the engine control type: either mechanical or electronic, with mechanical control being the reference category in the model (“me” = 0). A significant coefficient would indicate a difference in mean NOx emission rates for electronically controlled compared to mechanically controlled engines.                                                                                                                                                      | This variable is only available for ship engines designed by MAN or Wärtsilä. Additionally, it is correlated with Tier — multicollinearity could inflate standard errors; VIF tests indicate acceptable but not negligible correlation. |
| Vessel Type                | Fixed effects to control for differences in NOx emission rates associated with specific vessel types that are typically distinguished by the type of cargo a ship is designed to transport. The measurements data include the                                                                                                                                                                                                                                                           | Simple univariate regressions indicate potentially significant differences in NOx emission rates among different vessel types. The                                                                                                      |

|                     |                                                                                                                                                                                                                                                                                                                                                                                                                                                            |                                                                                                                                                                                                                                                                                                           |
|---------------------|------------------------------------------------------------------------------------------------------------------------------------------------------------------------------------------------------------------------------------------------------------------------------------------------------------------------------------------------------------------------------------------------------------------------------------------------------------|-----------------------------------------------------------------------------------------------------------------------------------------------------------------------------------------------------------------------------------------------------------------------------------------------------------|
|                     | <p>following ship types: container ships, bulk carriers, cruise ships, general cargo carriers, reefers, roll-on/roll-off vessels (ro-ro), and tankers, with container ships being the reference category in the model. The cargo type can affect a ship's operational pattern (e.g., liner vs. tramper), energy demand from a ship's main and/or auxiliary engines (e.g., energy needed for refrigerated cargos on a reefer or a container ship), etc.</p> | <p>effects observed in univariate regressions may be partially attributable to other control variables that correlate with vessel type (e.g., engine kW and stroke); however, the "vessel type" variable controls for additional, unobserved fixed effects that may contribute to NOx emission rates.</p> |
| Year of Observation | <p>Fixed effects to control for the year in which the measurements were taken. Controls for unobserved differences in the measurements year-to-year.</p>                                                                                                                                                                                                                                                                                                   |                                                                                                                                                                                                                                                                                                           |

Table S3: Regression model estimates of NOx emission rates, in gNOx/kWh, including fixed effects and interaction variables.

|                                   | <b>1</b>              | <b>1a</b>             | <b>2</b>             | <b>3</b>             | <b>4</b>             | <b>5</b>             |
|-----------------------------------|-----------------------|-----------------------|----------------------|----------------------|----------------------|----------------------|
| Intercept                         | 1.101<br>(1.209)      | -1.852<br>(1.661)     | -0.695<br>(1.461)    | 0.996<br>(1.489)     | -1.173<br>(1.460)    | 0.724<br>(1.484)     |
| Load                              | -11.465***<br>(1.239) | -10.887***<br>(1.337) | -8.643***<br>(1.088) | -6.164***<br>(1.065) | -7.781***<br>(1.056) | -5.988***<br>(1.065) |
| Load^2                            | 7.969***<br>(0.889)   | 7.562***<br>(0.956)   | 5.992***<br>(0.793)  | 4.512***<br>(0.783)  | 6.176***<br>(0.804)  | 5.053***<br>(0.796)  |
| Tier 0 (ref. Tier I)              | 2.371***<br>(0.280)   | 2.052***<br>(0.426)   | 2.431***<br>(0.427)  | 2.156***<br>(0.371)  | 2.485***<br>(0.426)  | 2.270***<br>(0.359)  |
| Tier II (ref. Tier I)             | 1.238***<br>(0.221)   | 1.625***<br>(0.231)   | -0.581**<br>(0.235)  | -0.091<br>(0.227)    | -0.480**<br>(0.239)  | -0.139<br>(0.253)    |
| 4S Engine (ref. 2S)               | -1.803***<br>(0.168)  | -1.284***<br>(0.235)  | -1.023***<br>(0.212) | -0.876***<br>(0.187) | -1.047***<br>(0.213) | -0.775***<br>(0.189) |
| log Main Engine kW                | 1.573***<br>(0.116)   | 1.823***<br>(0.161)   | 1.570***<br>(0.142)  | 1.450***<br>(0.141)  | 1.553***<br>(0.141)  | 1.381***<br>(0.148)  |
| Electronic Control                |                       |                       | 3.427***<br>(0.227)  | 2.895***<br>(0.207)  | 5.442***<br>(0.464)  | 5.864***<br>(0.684)  |
| Electronic Control: Load          |                       |                       |                      |                      | -3.174***<br>(0.548) | -2.715***<br>(0.493) |
| Electronic Control: Bulk Carrier  |                       |                       |                      |                      |                      | -1.733***<br>(0.566) |
| Electronic Control: Cruise        |                       |                       |                      |                      |                      | -4.658***<br>(0.902) |
| Electronic Control: General Cargo |                       |                       |                      |                      |                      | -2.075***<br>(0.622) |
| Electronic Control: Reefer        |                       |                       |                      |                      |                      | -0.925<br>(0.803)    |
| Electronic Control: Ro-Ro         |                       |                       |                      |                      |                      | -3.528***<br>(1.021) |
| Electronic Control: Tanker        |                       |                       |                      |                      |                      | -0.837<br>(0.574)    |
| Bulk Carrier                      |                       |                       |                      | -1.756***<br>(0.320) |                      | -0.980***<br>(0.302) |
| Cruise                            |                       |                       |                      | -4.916***<br>(0.480) |                      | -3.602***<br>(0.452) |
| General Cargo                     |                       |                       |                      | -1.470***<br>(0.336) |                      | -0.884***<br>(0.330) |
| Reefer                            |                       |                       |                      | -2.618***<br>(0.454) |                      | -2.168***<br>(0.566) |
| Ro-Ro                             |                       |                       |                      | -0.518<br>(0.504)    |                      | 0.359<br>(0.446)     |
| Tanker                            |                       |                       |                      | -1.674***<br>(0.293) |                      | -1.230***<br>(0.272) |
| Year = 2019                       | 0.662***<br>(0.127)   | 0.768***<br>(0.157)   | 0.737***<br>(0.136)  | 0.606***<br>(0.115)  | 0.728***<br>(0.136)  | 0.607***<br>(0.112)  |
| Year = 2020                       | 0.708***<br>(0.144)   | 0.753***<br>(0.161)   | 0.692***<br>(0.146)  | 0.467***<br>(0.134)  | 0.671***<br>(0.144)  | 0.460***<br>(0.129)  |
| Year = 2021                       | 0.924***<br>(0.150)   | 1.072***<br>(0.165)   | 1.033***<br>(0.147)  | 0.819***<br>(0.134)  | 1.031***<br>(0.145)  | 0.833***<br>(0.130)  |
| Year = 2022                       | -1.897***<br>(0.183)  | -2.078***<br>(0.204)  | -2.213***<br>(0.189) | -2.259***<br>(0.189) | -2.221***<br>(0.191) | -2.306***<br>(0.196) |

|                           | <b>1</b>  | <b>1a</b> | <b>2</b>  | <b>3</b>  | <b>4</b>  | <b>5</b>  |
|---------------------------|-----------|-----------|-----------|-----------|-----------|-----------|
| Year = 2023               | -0.734*** | -0.585*** | -0.648*** | -0.666*** | -0.659*** | -0.641*** |
|                           | (0.146)   | (0.164)   | (0.142)   | (0.129)   | (0.141)   | (0.127)   |
| Year = 2024               | -1.002*** | -0.958*** | -0.980*** | -1.072*** | -0.991*** | -1.056*** |
|                           | (0.176)   | (0.192)   | (0.175)   | (0.163)   | (0.175)   | (0.160)   |
| Year Fixed Effects        | Yes       | Yes       | Yes       | Yes       | Yes       | Yes       |
| Vessel Type Fixed Effects | No        | No        | No        | Yes       | No        | Yes       |
| Sample                    | Full      | EC        | EC        | EC        | EC        | EC        |
| Clustered Standard Error  | Vessel    | Vessel    | Vessel    | Vessel    | Vessel    | Vessel    |
| N                         | 14,977    | 11,977    | 11,977    | 11,977    | 11,977    | 11,977    |
| R-squared                 | 0.247     | 0.206     | 0.280     | 0.321     | 0.285     | 0.337     |
| R-squared Adj.            | 0.246     | 0.205     | 0.279     | 0.32      | 0.285     | 0.335     |

Standard errors in parentheses. \* p<0.1, \*\* p<0.05, \*\*\*p<0.01

EC: Vessels with known engine control type

Table S4: Regression model estimates of NOx emission rates, in gNOx/kg-Fuel, including fixed effects and interaction variables.

|                                   | <b>1</b>   | <b>1a</b>  | <b>2</b>  | <b>3</b>   | <b>4</b>   | <b>5</b>   |
|-----------------------------------|------------|------------|-----------|------------|------------|------------|
| Intercept                         | -9.111     | -26.087*** | -19.316** | -8.781     | -21.627*** | -9.722     |
|                                   | (6.776)    | (9.492)    | (8.310)   | (8.421)    | (8.325)    | (8.436)    |
| Load                              | -17.896*** | -14.258**  | -1.129    | 13.121**   | 3.043      | 13.303**   |
|                                   | (6.450)    | (7.134)    | (5.833)   | (5.747)    | (5.767)    | (5.846)    |
| Load^2                            | 15.112***  | 12.518**   | 3.33      | -5.193     | 4.222      | -2.294     |
|                                   | (4.688)    | (5.153)    | (4.297)   | (4.267)    | (4.403)    | (4.382)    |
| Tier 0 (ref. Tier I)              | 9.472***   | 7.687***   | 9.908***  | 8.380***   | 10.168***  | 9.083***   |
|                                   | (1.510)    | (2.291)    | (2.295)   | (2.033)    | (2.295)    | (1.966)    |
| Tier II (ref. Tier I)             | 7.464***   | 9.666***   | -3.244**  | -0.412     | -2.757**   | -0.768     |
|                                   | (1.289)    | (1.345)    | (1.355)   | (1.315)    | (1.376)    | (1.471)    |
| 4S Engine (ref. 2S)               | -13.972*** | -11.255*** | -9.724*** | -8.724***  | -9.843***  | -8.098***  |
|                                   | (0.952)    | (1.298)    | (1.166)   | (1.050)    | (1.172)    | (1.063)    |
| log Main Engine kW                | 9.026***   | 10.463***  | 8.985***  | 8.223***   | 8.901***   | 7.806***   |
|                                   | (0.655)    | (0.923)    | (0.808)   | (0.798)    | (0.805)    | (0.843)    |
| Electronic Control                |            |            | 20.055*** | 16.998***  | 29.810***  | 32.336***  |
|                                   |            |            | (1.306)   | (1.196)    | (2.575)    | (3.880)    |
| Electronic Control: Load          |            |            |           |            | -15.366*** | -12.355*** |
|                                   |            |            |           |            | (3.049)    | (2.782)    |
| Electronic Control: Bulk Carrier  |            |            |           |            |            | -10.572*** |
|                                   |            |            |           |            |            | (3.270)    |
| Electronic Control: Cruise        |            |            |           |            |            | -27.430*** |
|                                   |            |            |           |            |            | (5.086)    |
| Electronic Control: General Cargo |            |            |           |            |            | -12.185*** |
|                                   |            |            |           |            |            | (3.559)    |
| Electronic Control: Reefer        |            |            |           |            |            | -5.145     |
|                                   |            |            |           |            |            | (4.466)    |
| Electronic Control: Ro-Ro         |            |            |           |            |            | -19.867*** |
|                                   |            |            |           |            |            | (5.556)    |
| Electronic Control: Tanker        |            |            |           |            |            | -5.268     |
|                                   |            |            |           |            |            | (3.329)    |
| Bulk Carrier                      |            |            |           | -10.333*** |            | -5.641***  |
|                                   |            |            |           | (1.851)    |            | (1.710)    |
| Cruise                            |            |            |           | -28.343*** |            | -20.558*** |
|                                   |            |            |           | (2.739)    |            | (2.543)    |
| General Cargo                     |            |            |           | -8.978***  |            | -5.515***  |
|                                   |            |            |           | (1.903)    |            | (1.834)    |
| Reefer                            |            |            |           | -15.149*** |            | -12.569*** |
|                                   |            |            |           | (2.493)    |            | (3.081)    |
| Ro-Ro                             |            |            |           | -3.714     |            | 1.296      |
|                                   |            |            |           | (2.718)    |            | (2.389)    |
| Tanker                            |            |            |           | -9.726***  |            | -7.011***  |
|                                   |            |            |           | (1.700)    |            | (1.546)    |
| Year = 2019                       | 3.836***   | 4.396***   | 4.212***  | 3.472***   | 4.171***   | 3.491***   |
|                                   | (0.725)    | (0.888)    | (0.763)   | (0.655)    | (0.764)    | (0.637)    |

|                           | <b>1</b>   | <b>1a</b>  | <b>2</b>   | <b>3</b>   | <b>4</b>   | <b>5</b>   |
|---------------------------|------------|------------|------------|------------|------------|------------|
| Year = 2020               | 4.133***   | 4.364***   | 4.007***   | 2.729***   | 3.905***   | 2.701***   |
|                           | (0.819)    | (0.919)    | (0.830)    | (0.766)    | (0.821)    | (0.737)    |
| Year = 2021               | 5.301***   | 6.177***   | 5.950***   | 4.733***   | 5.938***   | 4.828***   |
|                           | (0.848)    | (0.942)    | (0.836)    | (0.770)    | (0.828)    | (0.745)    |
| Year = 2022               | -10.800*** | -11.734*** | -12.525*** | -12.760*** | -12.564*** | -13.030*** |
|                           | (1.018)    | (1.175)    | (1.086)    | (1.060)    | (1.096)    | (1.092)    |
| Year = 2023               | -4.087***  | -3.331***  | -3.696***  | -3.769***  | -3.749***  | -3.634***  |
|                           | (0.827)    | (0.944)    | (0.816)    | (0.745)    | (0.814)    | (0.732)    |
| Year = 2024               | -5.632***  | -5.510***  | -5.640***  | -6.139***  | -5.695***  | -6.053***  |
|                           | (0.995)    | (1.107)    | (1.005)    | (0.934)    | (1.003)    | (0.918)    |
| Year Fixed Effects        | Yes        | Yes        | Yes        | Yes        | Yes        | Yes        |
| Vessel Type Fixed Effects | No         | No         | No         | Yes        | No         | Yes        |
| Sample                    | Full       | MW         | MW         | MW         | MW         | MW         |
| Clustered Standard Error  | Vessel     | Vessel     | Vessel     | Vessel     | Vessel     | Vessel     |
| N                         | 14,977     | 11,977     | 11,977     | 11,977     | 11,977     | 11,977     |
| R-squared                 | 0.268      | 0.211      | 0.287      | 0.328      | 0.291      | 0.342      |
| R-squared Adj.            | 0.268      | 0.21       | 0.286      | 0.327      | 0.29       | 0.341      |

## SFOC Discussion

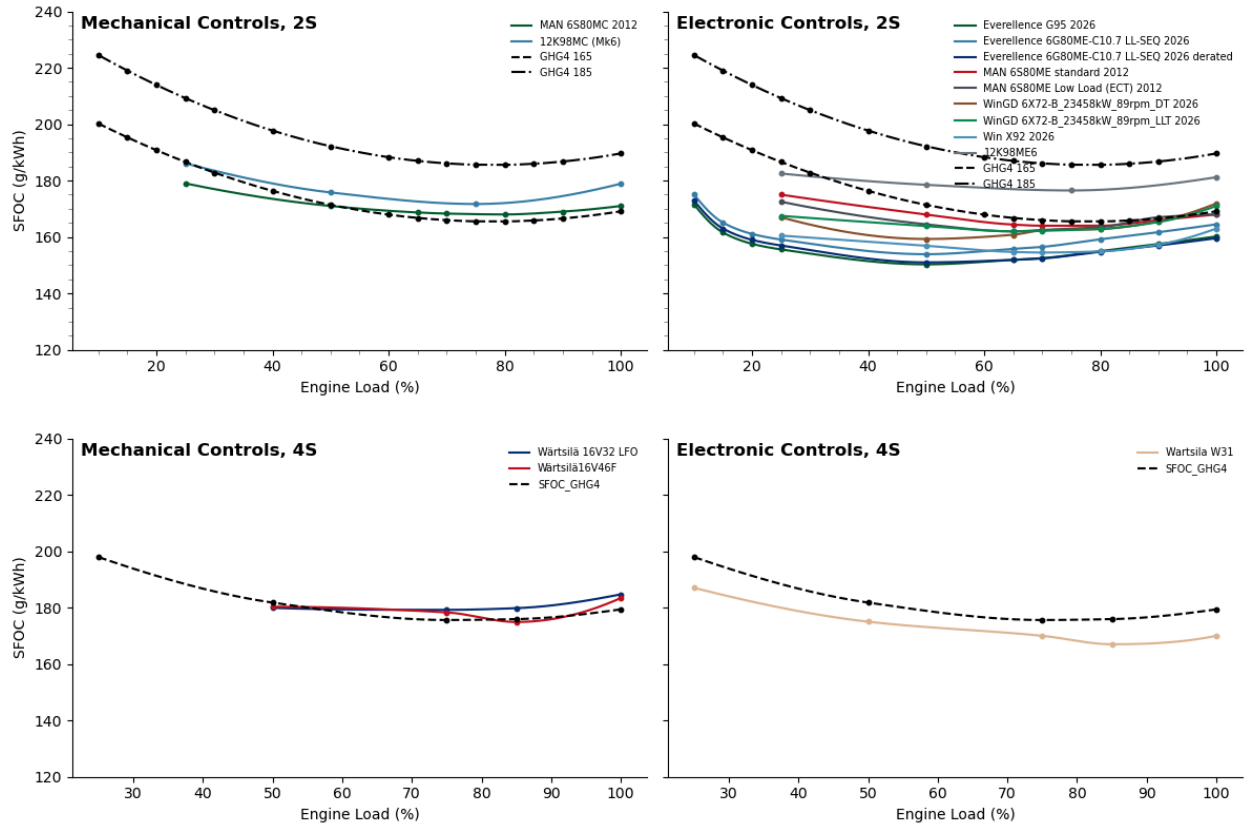

**Fig S4.** SFOC curves for two-stroke (top panel) and four-stroke (bottom panel) engines are obtained from engine project catalogues. K98 data are derived from published empirical measurements and curves from the IMO GHG4 Study ( $SFOC_{Base}$ : 165 and 185 g/kWh) show the typically modeled range.

Figure S4 compares SFOC data from engine catalogues and real measurements for K98 engines from two build years (Cheng et al., 2018) against the IMO GHG4 Study reference curves (base SFOC: 165 and 185 g/kWh), illustrating the potential modeled range. Deviations are largest for 2-stroke engines at low loads, reaching approximately 20% at 20% engine load, and diminish at higher loads. Modeled and measured SFOC values should be compared using the same  $SFOC_{Base}$ . The IMO GHG4 function describes only the shape of the modeled SFOC–load relationship at two  $SFOC_{Base}$  values. Direct comparison would apply each engine's manufacturer-specified  $SFOC_{Base}$  to generate like-for-like curves. The two reference curves shown here approximate this range.

Figure S5 shows the ratio of NO<sub>x</sub> emissions (gNO<sub>x</sub>/kg-fuel) between electronically and mechanically controlled engines by vessel type, derived from Model 5 coefficients. Ratios range from 1.32–1.45 at 10% load (Bulk Carrier to Reefer), 1.23–1.35 at 50% load (Bulk Carrier to Container Ship), and 1.17–1.30 at 75% load (Bulk Carrier to Container Ship). Even accounting

for SFOC uncertainty, these ratios confirm that the emissions gap between electronically and mechanically controlled engines remains substantial across all vessel types and load conditions.

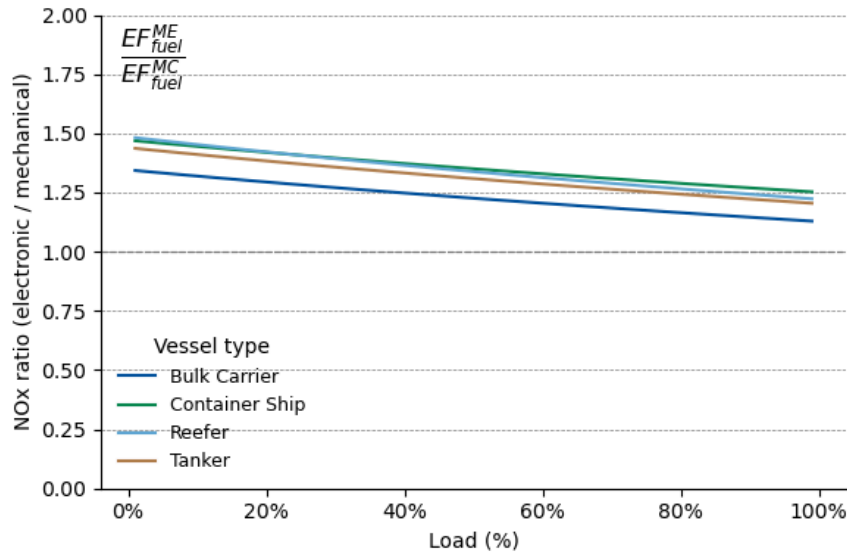

**Fig S5.** Ratio of estimated NOx emissions (gNOx/kg-Fuel) for selected vessel types using Model 5 regression coefficients. Curves show the NOx ratio is higher at low loads for Electronically Controlled (ME) engines relative to Mechanically Controlled (MC) engines.

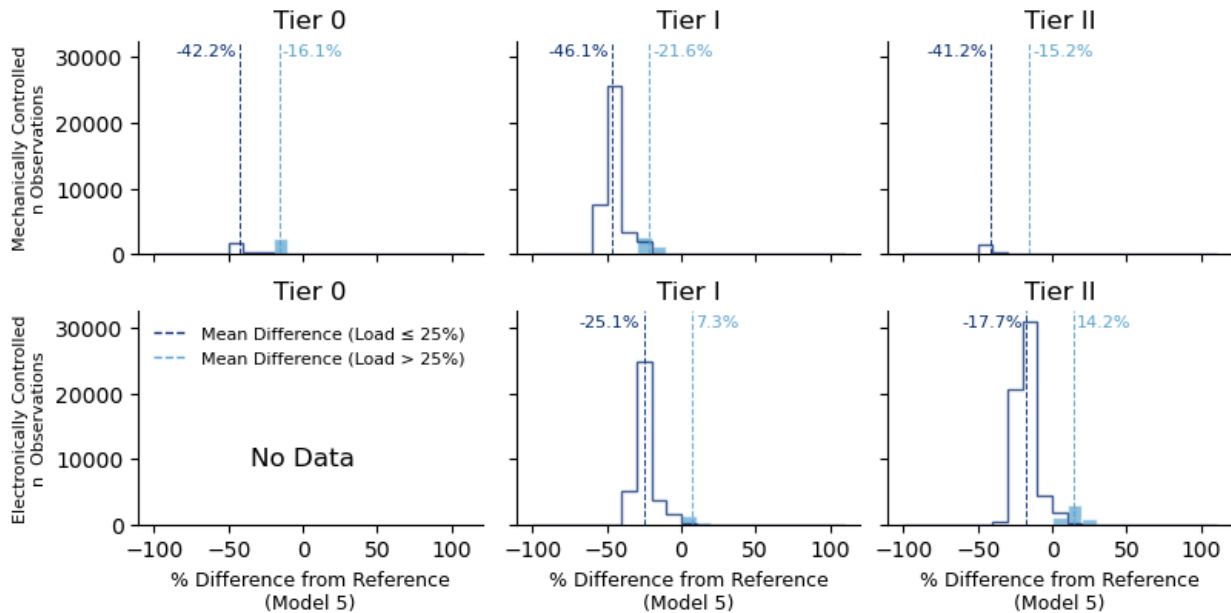

**Figure S6:** Fleet-level differences in regression-estimated emission rates for container ships calling at the San Pedro Bay Ports in 2014. n represents the number of AIS observations from which emissions were estimated. Histograms show as % deviations from standard emission factors used in emission inventory models, across engine tiers for electronically and mechanically controlled engines.
